# Supplementary material for: Incidence rate, risk factors, and management of Bell’s palsy in the Qurayyat region of Saudi Arabia
Source: PeerJ. 2022 Oct 6;10:e14076. doi: 10.7717/peerj.14076 (PMC9548320; doi:10.7717/peerj.14076)
Supplement: Supplemental Information 1 [file peerj-10-14076-s001.pdf]

١. الجنس

- ☐ ذكر
- ☐ انثى

٢. العمر

- ☐ من ٢١-٣٠
- ☐ من ٣١-٤٠
- ☐ من ٤١-٥٠
- ☐ من ٥١-٦٠
- ☐ من ٦١ و أكثر

٣. كيف بدأت إصابتك بشلل الوجه؟

- ☐ مفاجئة
- ☐ تدريجية

٤. هل تكررت أصابتك؟

- ☐ لا
- ☐ نعم

٥. كم مرة تكررت إصابتك؟

- ☐ 1
- ☐ 2
- ☐ 3
- ☐ 4 و اكثر

٦. هل أخذت تطعيمات قبل الإصابة بشلل الوجه ؟

- ☐ لا
- ☐ نعم

٧. هل تعرضت لتيار هواء بارد قبل الإصابة بشلل الوجه؟

- ☐ لا
- ☐ نعم

٨. هل أصبت بعدوى فيروسية قبل الإصابة بشلل الوجه ؟

- ☐ لا
- ☐ نعم

٩. هل أصبت بنزلات برد قبل الإصابة بشلل الوجه؟

- ☐ لا
- ☐ نعم

١٠. هل أصبت بالإنفلونزا قبل الإصابة بشلل الوجه؟

١١. هل لديك ارتفاع في ضغط الدم ؟

- ☐ لا
- ☐ نعم

١٢. هل لديك مرض السكري؟

- ☐ لا
- ☐ نعم

١٣. هل لديك التهابات في الاذن ؟

- ☐ لا
- ☐ نعم

١٤. هل تعرضت لإصابة في الرأس ؟

- ☐ لا
- ☐ نعم

١٥. هل أجريت عملية في الرأس أو الرقبة أو الوجه ؟

- ☐ لا
- ☐ نعم

١٦. ما هو الجانب المصاب بشلل الوجه ؟

- ☐ الایسر
- ☐ الایمن
- ☐ كلاهما

١٧. هل هناك صلة قرابة بين الأب والأم ؟

- ☐ لا
- ☐ نعم

١٨. هل أصيب أحد من عائلتك بشلل الوجه ؟

- ☐ لا
- ☐ نعم

١٩. هل لديك أمراض وراثية ؟

- ☐ لا
- ☐ نعم

٢٠. هل أصبت بجلطة قبل الإصابة بشلل الوجه ؟

- ☐ لا
- ☐ نعم

٢١. هل لديك أمراض عصبية ؟

- ☐ لا
- ☐ نعم

٢٢. هل لديك أمراض او مشاكل في القلب ؟

- ☐ لا
- ☐ نعم

٢٣. هل لديك أمراض او مشاكل في الجهاز التنفسي ؟

- ☐ لا
- ☐ نعم

٢٤. هل أنت مدخن ؟

- ☐ لا
- ☐ نعم

٢٥. هل لديك عيوب او تشوهات خلقية في الرأس ؟

- ☐ لا
- ☐ نعم

٢٦. هل لديك مشاكل في العين ؟

- ☐ لا
- ☐ نعم

٢٧. هل لديك مشاكل في التوازن ؟

- ☐ لا
- ☐ نعم

٢٨. ماهي طريقة العلاج المستخدمة عندما اصبت بشلل الوجه؟
